# Supplementary material
Source: PubMed Central journal article supplement (PMC5298833)
Supplement: NIHMS844963-supplement-1.pdf [file NIHMS844963-supplement-1.pdf]

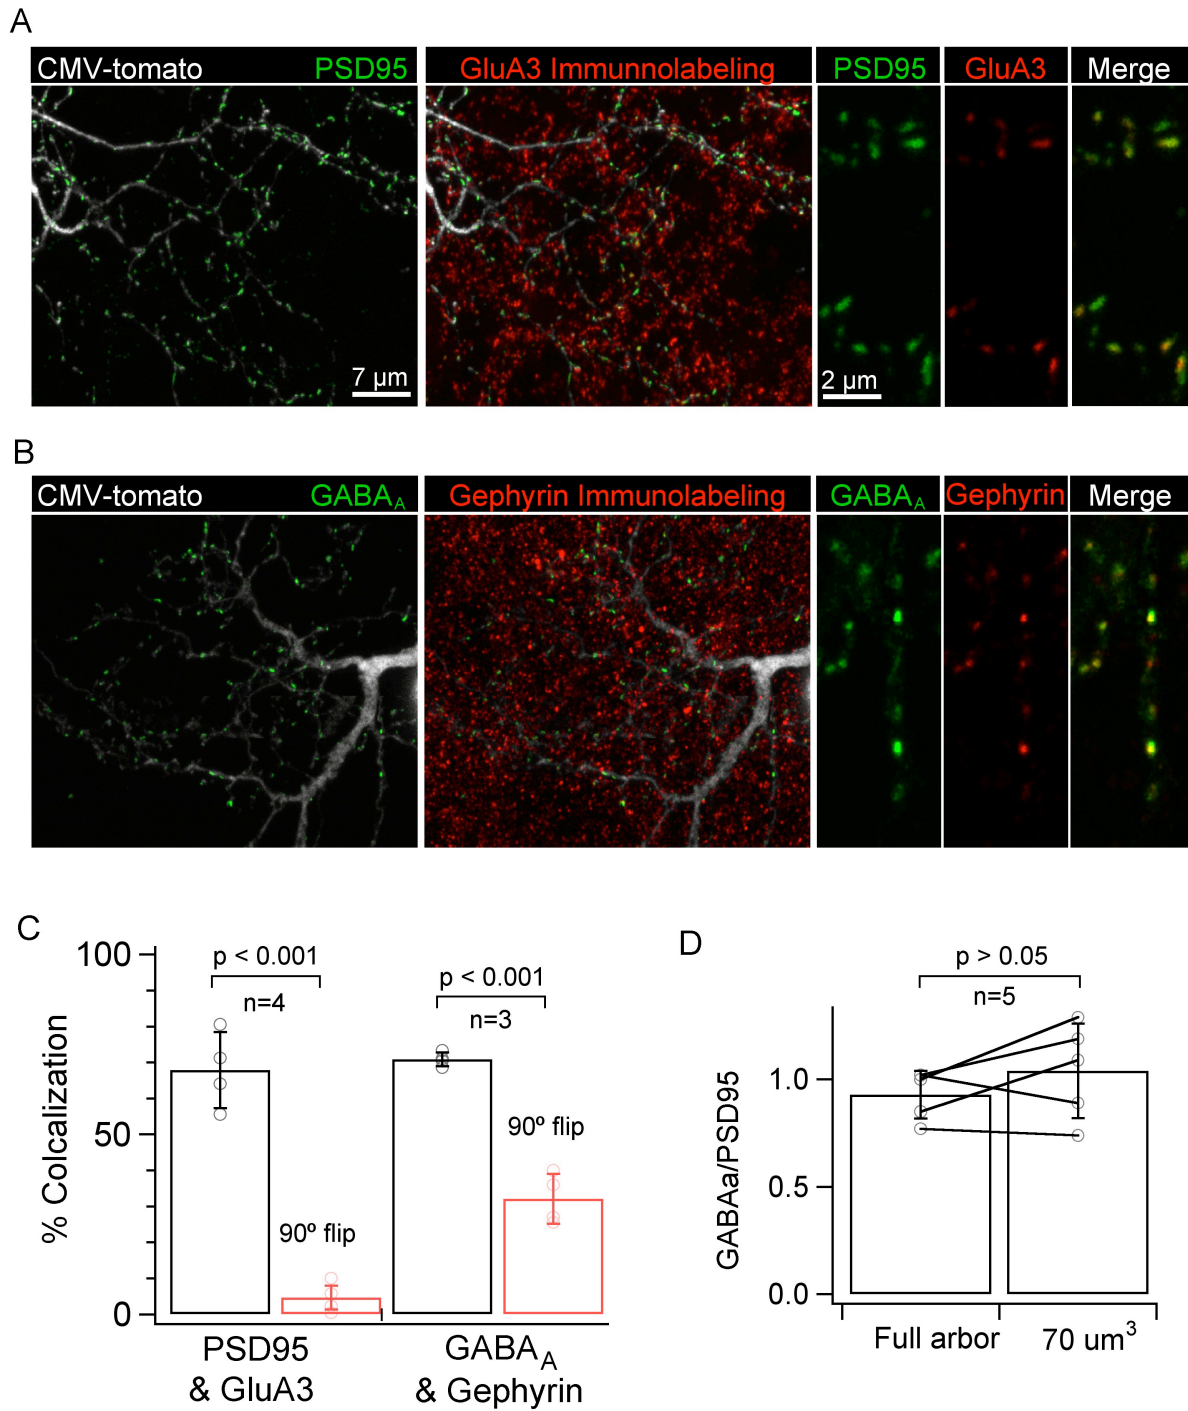

**Fig. S1 Related to Fig. 4: Transient expression of fluorescently-tagged PSD95 and GABA<sub>A</sub> receptors on MGC dendrites largely colocalize with endogenous synaptic components.**
