# Supplementary material
Source: PubMed Central journal article supplement (PMC5298833)
Supplement: NIHMS844963-supplement-4.pdf [file NIHMS844963-supplement-4.pdf]

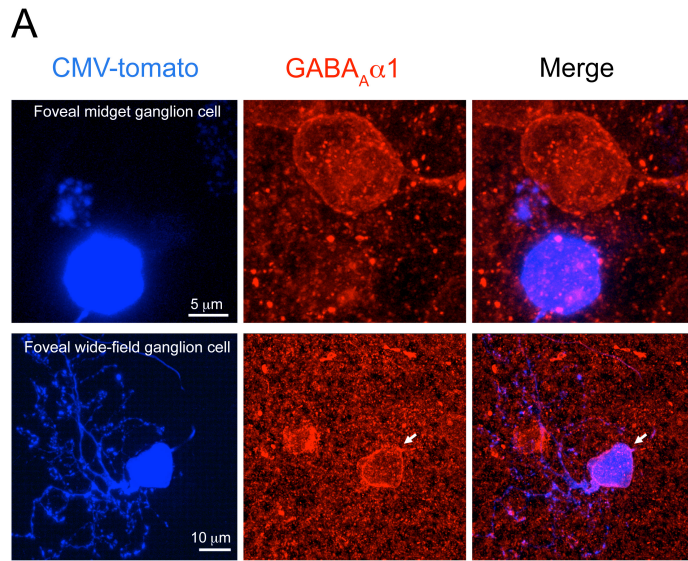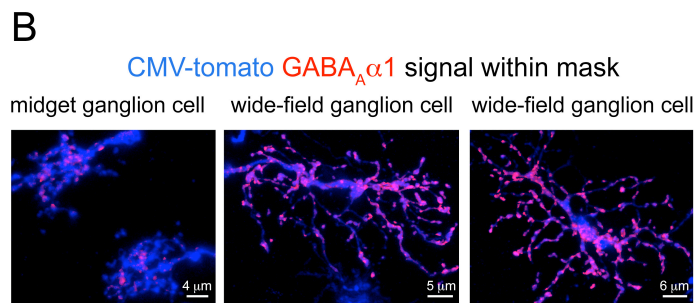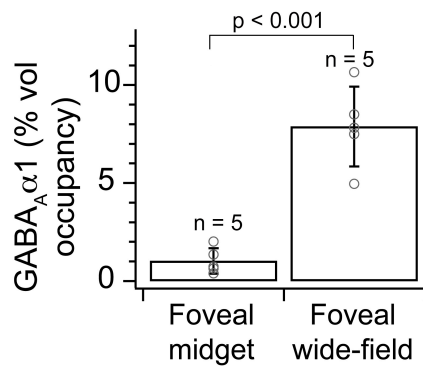

**Fig. S4 Related to Fig. 4: Immunostained GABA<sub>A</sub>α1 receptors within biolistically labeled foveal ganglion cells.**
