# Supplementary material
Source: PubMed Central journal article supplement (PMC5298833)
Supplement: NIHMS844963-supplement-5.pdf [file NIHMS844963-supplement-5.pdf]

A

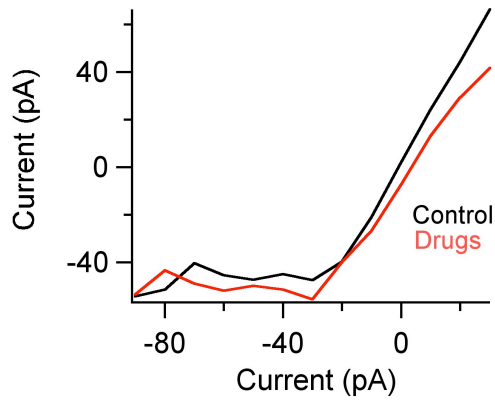

B

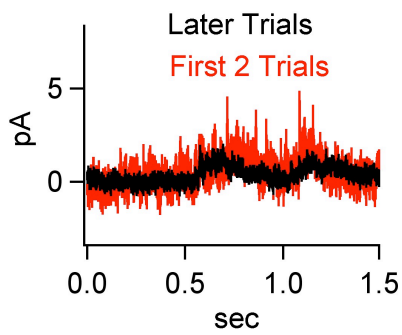

C

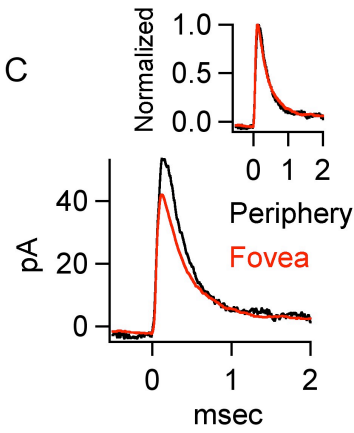

D

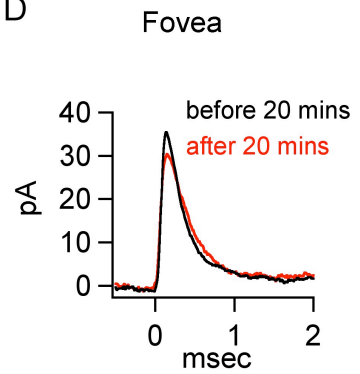

**Fig. S5 Related to Fig. 2: Current-Voltage (IV) relationship of ON foveal MGCs and time-dependent analysis of inhibitory synaptic currents MGCs.**
