# Supplementary material
Source: PubMed Central journal article supplement (PMC5298833)
Supplement: NIHMS844963-supplement-7.pdf [file NIHMS844963-supplement-7.pdf]

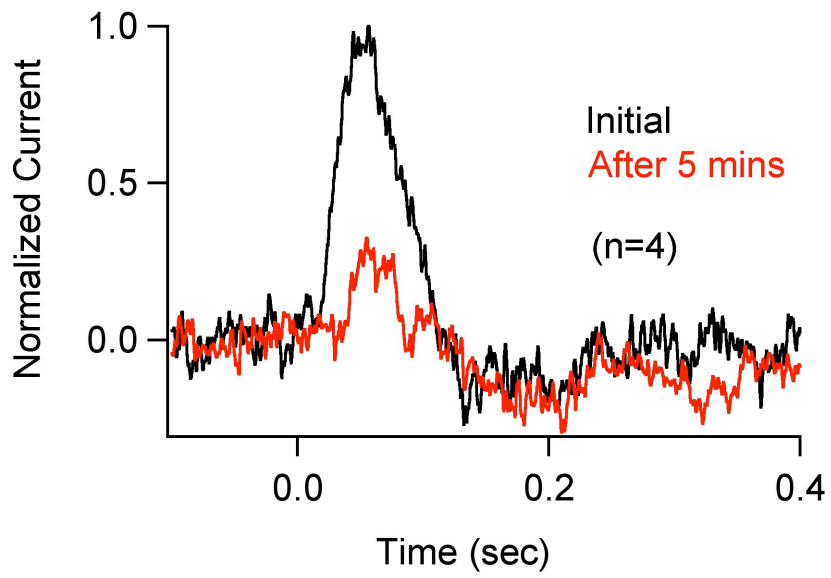

**Fig. S7 Related to Fig. 7: Gap-junctional coupling between photoreceptors probed during voltage clamp recordings.**
