# Supplementary material
Source: PubMed Central journal article supplement (PMC5298833)

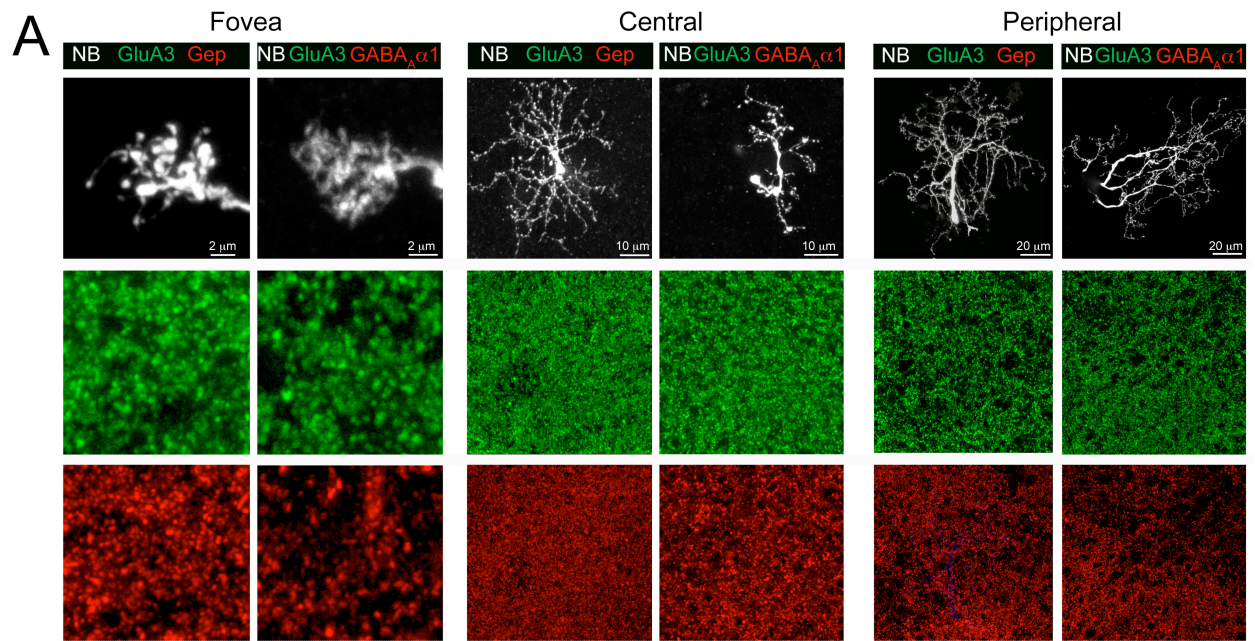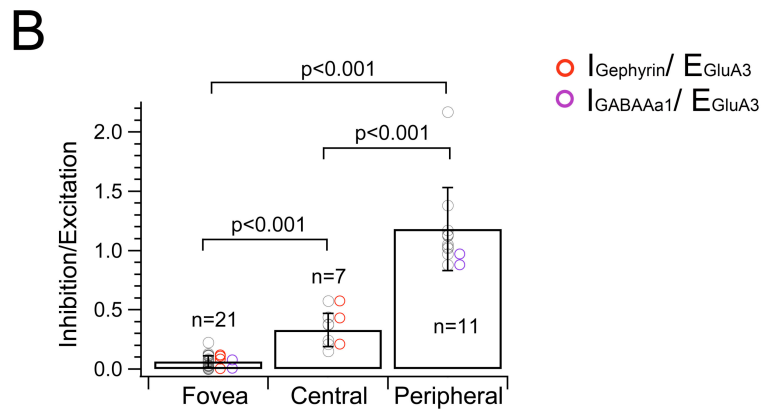

**Fig. S2 Related to Fig. 4: GluA3, Gephyrin and GABA<sub>A</sub> antibody labeling across eccentricities.**

Supplement: NIHMS844963-supplement-2.pdf [file NIHMS844963-supplement-2.pdf]

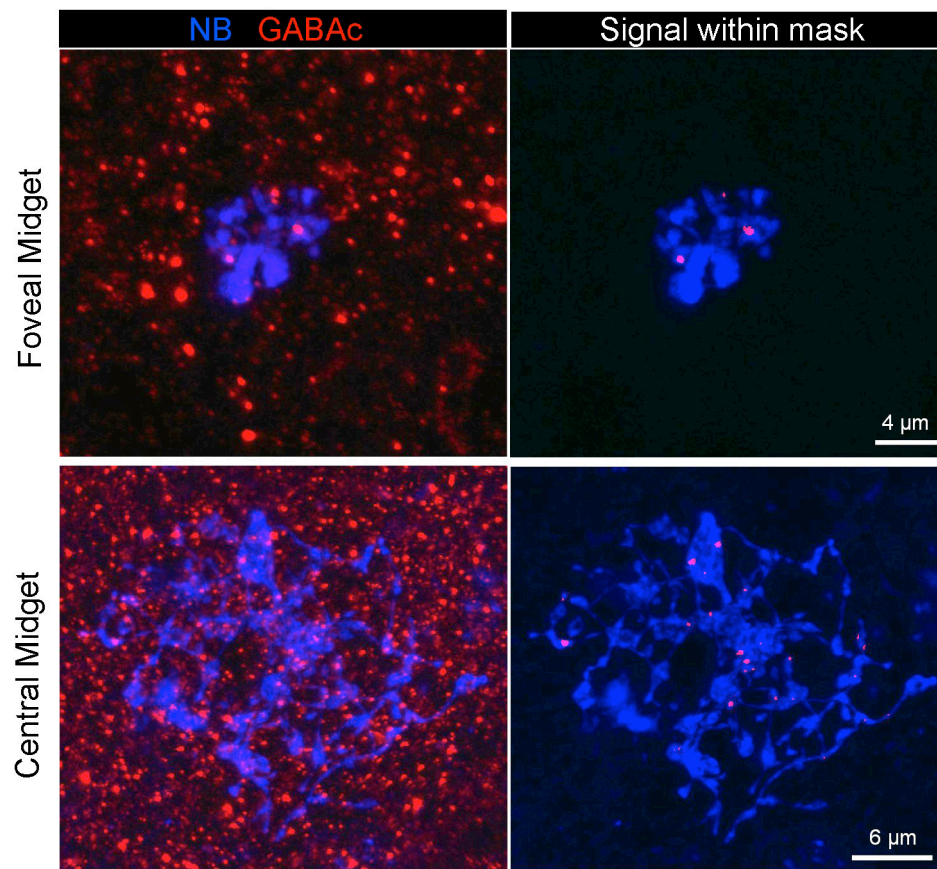

Fig. S6 Related to Fig. 4: Antibody labeling against GABA<sub>C</sub> receptors for MGCs.

Supplement: NIHMS844963-supplement-6.pdf [file NIHMS844963-supplement-6.pdf]
